# Supplementary material
Source: Springer Nature journal article supplement (https://www.springermedizin.de/resource/supplementary/13031_2012_102_MOESM2_ESM.pdf/9645156)

NGER YEC (KWAJENA)

YEYEESI (YEI)

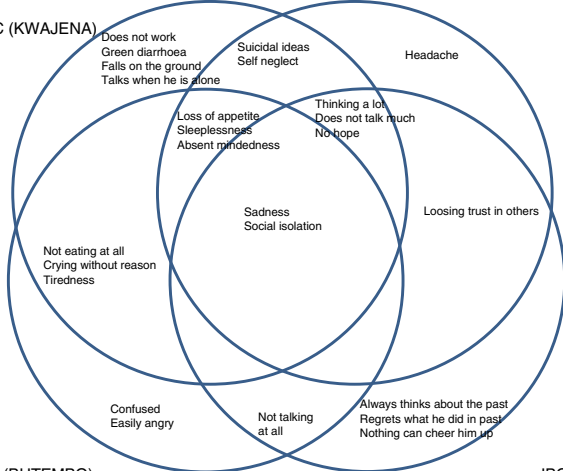

ALLUHIRE (BUTEMBO)

IBONGE (KIBUYE)

Supplement: MOESM2 [file 9645156]
